# Supplementary material for: Serum Allergen-Specific IgE among Pediatric Patients with Primary Immunodeficiency
Source: MDPI journal article supplement (doi:10.3390/children9040466), 2022-03-25
Supplement: s1 [file s1]

**Table S4.** Number of patients with the maximum sIgE concentration against allergens (if the patient had multiple sIgE detected, he/she has been classified to the higher class).

| Class | sIgE concentration [kU/L] | Number of patients (% of all patients in the study group) |
|-------|---------------------------|-----------------------------------------------------------|
| 0     | <0.35                     | 36 (50.00%)                                               |
| 1     | 0.35-<0.7                 | 13 (18.06%)                                               |
| 2     | 0.7-<3.5                  | 7 (9.72%)                                                 |
| 3     | 3.5-<17.5                 | 6 (8.33%)                                                 |
| 4     | 17.5-<50                  | 1 (1.39%)                                                 |
| 5     | 50-<100                   | 2 (2.78%)                                                 |
| 6     | >=100                     | 7 (9.72%)                                                 |
