# Supplementary material for: Serum Allergen-Specific IgE among Pediatric Patients with Primary Immunodeficiency
Source: MDPI journal article supplement (doi:10.3390/children9040466), 2022-03-25
Supplement: s1 [file s1]

**Table S3.** Characteristics of patients with positive ( $\geq 0.35$  kU/L) sIgE against allergens.

| Patient No | Age | Gender | PID type                        | Previous diagnosis of allergic disease | Reported allergy symptoms                                                                                                            | sIgE [kU/L]                                                                                                  | Total IgE [IU/ml]  | Correlation between sIgE and allergy symptoms | Eosinophil count [ $10^3/\mu\text{L}$ ] | Antihistamines |
|------------|-----|--------|---------------------------------|----------------------------------------|--------------------------------------------------------------------------------------------------------------------------------------|--------------------------------------------------------------------------------------------------------------|--------------------|-----------------------------------------------|-----------------------------------------|----------------|
| 1          | 15  | M      | X-linked agammaglobulinemia     | No                                     | Eczema<br>Pruritus                                                                                                                   | BSA = 0.43                                                                                                   | 15.5<br>[1.5-100]  | Not excluded                                  | 0.07                                    | No             |
| 2          | 8   | M      | IgM, IgG subclass deficiency    | A, AR, FA                              | Nasal obstruction<br>Sneezing<br>Nose/eyes itching<br>Trouble breathing with mouth closed<br>Recurrent bronchitis<br>Allergic asthma | 6 Grass mix = 2.9<br>D.pteronyssinus >100<br>D. farinae >100<br>Cat = 33.0<br>Dog = 0.89<br>A.alternata = 12 | 587<br>[0.5-393]   | Yes                                           | 1,77                                    | Yes            |
| 3          | 2   | M      | IgG subclass deficiency         | No                                     | Eczema<br>Pruritus                                                                                                                   | D. farinae = 0.37<br>BSA = 0.45                                                                              | 14 [0.4-351]       | Possible                                      | 0.35                                    | No             |
| 4          | 14  | M      | IgM deficiency                  | AR, FA                                 | Rhinorrhea<br>Diarrhoea                                                                                                              | D.pteronyssinus = 13.0<br>D. farinae = 65.0<br>Cat = 0.81<br>BSA = 0.5                                       | 207<br>[1.9-170]   | Yes                                           | 0,12                                    | No             |
| 5          | 14  | M      | CVID                            | No                                     | Eczema                                                                                                                               | BSA = 0.42                                                                                                   | 8.1 [1.9-170]      | Not excluded                                  | 0.1                                     | No             |
| 6          | 12  | M      | CVID                            | No                                     | Diarrhoea                                                                                                                            | BSA = 0.4                                                                                                    | 9.2 [1.9-170]      | Not excluded                                  | 0.08                                    | No             |
| 7          | 13  | M      | IgA deficiency                  | AD                                     | Nose/eyes itching<br>Eczema<br>Pruritus                                                                                              | Horse = 0.53<br>Cow's milk = 2.0<br>BSA = 38.0                                                               | 34,2<br>[1.9-170]  | Possible                                      | 0,17                                    | No             |
| 8          | 7   | M      | IgM and IgG subclass deficiency | No                                     | Sneezing                                                                                                                             | D.pteronyssinus >100<br>D. farinae >100<br>Cat = 1.2<br>Dog = 2.2<br>Horse = 0.45                            | 328<br>[0.5-393]   | Yes                                           | 3.75                                    | No             |
| 9          | 6   | F      | IgG subclass deficiency         | A, AD, FA                              | Eczema<br>Pruritus<br>Allergic asthma<br>Sneezing<br>Nose/eyes itching                                                               | 6 Grass mix >100<br>Birch pollen >100<br>Mugwort pollen = 0.86<br>D.pteronyssinus = 4.5                      | 823.5<br>[0.5-393] | Yes                                           | 0,32                                    | Yes            |

|    |    |   |                         |       |                                                                                                                                  |                                                                                                                                                                                                                                                                   |                    |              |      |     |
|----|----|---|-------------------------|-------|----------------------------------------------------------------------------------------------------------------------------------|-------------------------------------------------------------------------------------------------------------------------------------------------------------------------------------------------------------------------------------------------------------------|--------------------|--------------|------|-----|
|    |    |   |                         |       | Trouble breathing with mouth closed                                                                                              | D. farinae =48<br>Cat = 0.27<br>Dog = 74<br>C.herberum = 1.9<br>A.alternata = 5.0<br>Egg white = 0.94<br>Cow's milk = 0.94<br>Casein = 0.36<br>Flour Mix 0.46<br>Rice = 0.86<br>Peanut = 54.0<br>Hazelnut = 0.91<br>Carrot = 0.77<br>Potato = 1.8<br>Apple = 0.99 |                    |              |      |     |
| 10 | 9  | M | IgG deficiency          | A     | Recurrent bronchitis<br>Cough<br>Nasal congestion<br>Trouble breathing<br>Milk allergy in the past,<br>nondairy diet in the past | BSA = 0.51                                                                                                                                                                                                                                                        | 203.2<br>[0.5-393] | Not excluded | 0,17 | No  |
| 11 | 15 | M | IgA and IgM deficiency  | No    | Abdominal cramping, bloating                                                                                                     | BSA = 0.72                                                                                                                                                                                                                                                        | 16.8<br>[1.5-100]  | Not excluded | 0.05 | No  |
| 12 | 12 | F | IgG subclass deficiency | AR    | Sneezing<br>Nose/eyes itching<br>Watery eyes<br>Need to rub eyes/nose<br>Nasal obstruction                                       | 6 Grass mix >100<br>Birch pollen =3.5<br>Mugwort pollen = 0.81<br>D.pteronyssinus = 1.3<br>D. farinae = 11<br>Cat = 4.1<br>Dog = 0.6<br>A.alternata = 1.2<br>Flour Mix = 0.43<br>Rice = 0.48<br>Carrot = 0.50                                                     | 466<br>[1.9-170]   | Yes          | 0,17 | Yes |
| 13 | 6  | M | IgA deficiency          | A, AR | Sneezing<br>Nose/eyes itching<br>Watery eyes<br>Need to rub eyes/nose                                                            | D.pteronyssinus >100<br>D. farinae >100<br>BSA = 4.8<br>Cow's milk = 0.44                                                                                                                                                                                         | 699<br>[0.5-393]   | Yes          | 0,35 | Yes |

|    |     |   |                                 |            |                                                                                                                       |                                       |                   |              |      |     |
|----|-----|---|---------------------------------|------------|-----------------------------------------------------------------------------------------------------------------------|---------------------------------------|-------------------|--------------|------|-----|
|    |     |   |                                 |            | Nasal obstruction<br>Nasal congestion<br>Rhinorrhoea<br>Abdominal cramping<br>Recurrent bronchitis<br>Allergic asthma |                                       |                   |              |      |     |
| 14 | 5   | M | IgG subclass deficiency         | AD         | Eczema<br>Rhinorrhoea<br>Trouble breathing<br>Cough                                                                   | BSA = 0.42                            | 594<br>[0.5-393]  | Not excluded | 0,12 | No  |
| 15 | 4   | F | IgG subclass deficiency         | A          | Sneezing<br>Nose/eyes itching<br>Watery eyes<br>Need to rub eyes/nose<br>Allergic asthma<br>Recurrent bronchitis      | Birch pollen =1.3<br>Cat = 15         | 38.4<br>[0.4-351] | Yes          | 0,72 | Yes |
| 16 | 8   | M | IgM and IgG subclass deficiency | A, AR, FA  | Rhinorrhoea<br>Cough<br>Nasal congestion<br>Trouble breathing with mouth closed<br>Recurrent bronchitis<br>Eczema     | D. farinae = 1.1                      | 19.5<br>[0.5-393] | Yes          | 0,21 | No  |
| 17 | 2,5 | M | IgG subclass deficiency         | AD, FA     | Eczema<br>Milk allergy in the past<br>Nondairy diet in the past                                                       | BSA = 0.9                             | 35.6<br>[0.4-351] | Possible     | 0,91 | No  |
| 18 | 4   | M | IgA deficiency                  | No         | Cough<br>Nasal congestion<br>Rhinorrhoea                                                                              | BSA = 2.2                             | <10<br>[<60]      | Unlikely     | 0.26 | No  |
| 19 | 6   | F | IgA and IgG subclass deficiency | AD, AR, FA | Sneezing<br>Nose/eyes itching<br>Watery eyes<br>Need to rub eyes/nose<br>Rhinorrhoea                                  | 6 Grass mix = 60<br>Birch pollen =1.7 | 134<br>[<90]      | Yes          | 0,12 | Yes |

|    |    |   |                         |        |                                                                                                                                                           |                                                                                                    |                   |              |      |     |
|----|----|---|-------------------------|--------|-----------------------------------------------------------------------------------------------------------------------------------------------------------|----------------------------------------------------------------------------------------------------|-------------------|--------------|------|-----|
|    |    |   |                         |        | Nasal obstruction<br>Eczema                                                                                                                               |                                                                                                    |                   |              |      |     |
| 20 | 10 | F | IgG subclass deficiency | AR     | Rhinitis                                                                                                                                                  | 6 Grass mix >100<br>Birch pollen = 0.63<br>Mugwort pollen = 0.64                                   | 227<br>[<200]     | Yes          | 0,22 | No  |
| 21 | 6  | M | IgA deficiency          | A      | Cough<br>Nasal congestion<br>Trouble breathing with mouth closed<br>Recurrent bronchitis<br>Diarrhoea                                                     | BSA = 0.89<br>Cow's milk = 0.41                                                                    | 2347<br>[<90]     | Possible     | 0,67 | No  |
| 22 | 2  | M | IgG deficiency          | AD, FA | Eczema<br>Nose itching<br>Need to rub nose<br>Nondairy diet                                                                                               | 6 Grass mix = 0.35<br>Birch pollen = 0.93                                                          | 10 [<60]          | Possible     | 0,18 | Yes |
| 23 | 16 | M | IgM deficiency          | AD, AR | Eczema<br>Rhinitis                                                                                                                                        | 6 Grass mix >100<br>Birch pollen = 0.50<br>Mugwort pollen = 0.51<br>Cow's milk = 0.54<br>BSA = 4.9 | 1157<br>[1.5-100] | Yes          | 0,17 | Yes |
| 24 | 4  | M | IgA and IgM deficiency  | No     | Abdominal cramping                                                                                                                                        | BSA = 2.0                                                                                          | 11.6<br>[0.5-393] | Not excluded | 0.12 | No  |
| 25 | 5  | M | SCID                    | No     | No symptoms                                                                                                                                               | BSA = 0.37                                                                                         | 7.5 [0.5-393]     | No           | 0.19 | No  |
| 26 | 10 | M | Ataxia-telangiectasia   | FA     | Vomiting<br>Abdominal cramping                                                                                                                            | BSA = 0.41                                                                                         | <1.5<br>[0.5-393] | Possible     | 0,38 | No  |
| 27 | 11 | F | Ataxia-telangiectasia   | No     | Eczema                                                                                                                                                    | BSA = 0.67                                                                                         | 9 [1.9-170]       | Not excluded | 0.17 | No  |
| 28 | 11 | M | Ataxia-telangiectasia   | No     | Rhinorrhoea<br>Cough<br>Trouble breathing with mouth closed<br>Nasal obstruction<br>Sneezing<br>Nose/eyes itching<br>Watery eyes<br>Need to rub eyes/nose | BSA = 0.45                                                                                         | 8.6 [1.9-170]     | Not excluded | 0.08 | No  |

|    |    |   |                                            |               |                                                                            |                                                                                                                                                                                                                                                    |                       |          |      |     |
|----|----|---|--------------------------------------------|---------------|----------------------------------------------------------------------------|----------------------------------------------------------------------------------------------------------------------------------------------------------------------------------------------------------------------------------------------------|-----------------------|----------|------|-----|
|    |    |   |                                            |               |                                                                            |                                                                                                                                                                                                                                                    |                       |          |      |     |
| 29 | 9  | F | DiGeorge syndrome                          | FA            | Rash<br>Abdominal<br>cramping,<br>bloating<br>Diarrhoea                    | BSA = 0.46                                                                                                                                                                                                                                         | 64,9<br>[0.5-<br>393] | Possible | 0,21 | No  |
| 30 | 9  | M | PRKDC mutation, IgG<br>subclass deficiency | AD, AR,<br>FA | Eczema<br>Nasal<br>congestion<br>Cough<br>Sneezing<br>Nose/eyes<br>itching | 6 Grass mix =4.1<br>Birch pollen<br>=0.36<br>Mugwort pollen<br>= 0.88<br>Cat = 0.96<br>Dog = 0.63                                                                                                                                                  | 131<br>[0.5-<br>393]  | Yes      | 0,23 | Yes |
| 31 | 4  | M | Nijmegen breakage<br>syndrome              | AD            | Eczema<br>Milk allergy in<br>the past                                      | BSA = 1.8<br>Cow's milk = 0.4                                                                                                                                                                                                                      | 10 [0.5-<br>393]      | Possible | 0,09 | No  |
| 32 | 7  | M | Complement<br>deficiency                   | No            | Cough                                                                      | Apple = 0.68                                                                                                                                                                                                                                       | 32.2<br>[0.5-<br>393] | Possible | 0.15 | No  |
| 33 | 3  | F | Complement<br>deficiency                   | AD            | Eczema<br>Pruritus<br>Excoriatio<br>Rhinorrhoea<br>Cough                   | Dog = 0.37<br>Horse = 0.36<br>BSA = 9.9<br>Cow's milk =<br>0.73                                                                                                                                                                                    | 10.5<br>[<60]         | Possible | 0,2  | No  |
| 34 | 2  | M | Phagocyte number/<br>function deficiency   | U             | Urticaria                                                                  | Cow's milk =<br>0.77<br>BSA = 7.0                                                                                                                                                                                                                  | 17.3<br>[<60]         | Possible | 0,22 | No  |
| 35 | 7  | F | Congenital asplenia                        | AR            | Rhinorrhea<br>Nose/eyes<br>itching                                         | 6 Grass mix = 4.0<br>Horse = 0.72<br>A.alternata = 9.4                                                                                                                                                                                             | 47.3<br>[0.5-<br>393] | Yes      | 0,27 | Yes |
| 36 | 10 | F | Impaired cellular<br>immunity              | U             | Urticaria<br>Flushing                                                      | 6 Grass mix = 2.7<br>Birch pollen<br>=0.36<br>Mugwort pollen<br>= 0.58<br>D.pteronyssinus<br>= 0.81<br>D. farinae = 0.94<br>Cow's milk =<br>0.52<br>BSA = 4.4<br>Flour Mix = 0.37<br>Rice = 0.44<br>Carrot = 0.39<br>Potato = 0.93<br>Apple = 1.00 | 908<br>[1.9-<br>170]  | Possible | 0,19 | Yes |

Abbreviations: A – asthma; AC – allergic conjunctivitis; AD – atopic dermatitis; AR – allergic rhinitis; BSA – bovine serum albumin; F – female; FA – food allergy; Ig – immunoglobulin; M – male; No – number; PID – primary immunodeficiencies; PRKDC - Protein Kinase, DNA-Activated, Catalytic Subunit; sIgE – specific IgE; U – urticaria.
