# Supplementary material for: Serum Allergen-Specific IgE among Pediatric Patients with Primary Immunodeficiency
Source: MDPI journal article supplement (doi:10.3390/children9040466), 2022-03-25
Supplement: s1 [file s1]

**Table S2.** Characteristics of patients during immunoglobulin replacement therapy (n=19).

| Patient No | Age | Gender | PID type                                   | sIgE [kU/l]                                                                                 | IgE [IU/ml] | IgG [mg/dL]     | Ig dose [g/kg] |
|------------|-----|--------|--------------------------------------------|---------------------------------------------------------------------------------------------|-------------|-----------------|----------------|
| 1          | 15  | M      | X-linked agammaglobulinemia                | BSA = 0.43                                                                                  | 15.5        | 872 [518-1284]  | 0.3            |
| 2          | 14  | M      | CVID                                       | BSA = 0.42                                                                                  | 8.1         | 886 [518-1284]  | 0.45           |
| 3          | 15  | M      | CVID                                       | <0.15                                                                                       | 8.7         | 425 [518-1284]  | 0.4            |
| 4          | 12  | M      | CVID                                       | BSA = 0.4                                                                                   | 9.2         | 858 [518-1284]  | 0.3            |
| 5          | 9   | M      | IgG deficiency                             | BSA = 0.51                                                                                  | 203.2       | 1145 [518-1284] | 0.3            |
| 6          | 4   | M      | IgG deficiency                             | <0.15                                                                                       | 9.1         | 849 [468-1150]  | 0.25           |
| 7          | 12  | F      | IgG deficiency                             | BSA = 0.27                                                                                  | 47          | 981 [553-1631]  | 0.3            |
| 8          | 8   | F      | IgG subclass deficiency                    | <0.15                                                                                       | 8.3         | 742 [553-1232]  | 0.3            |
| 9          | 7   | M      | IgG subclass and IgM deficiency            | D.pteronyssinus >100<br>D. farinae >100<br>Cat = 1.2<br>Dog = 2.2                           | 328.6       | 826 [553-1232]  | 0.35           |
| 10         | 9   | M      | PRKDC mutation<br>IgG subclass deficiency  | 6 Grass mix =4.1<br>Birch pollen =0.36<br>Mugwort pollen = 0.88<br>Cat = 0.96<br>Dog = 0.63 | 131         | 969 [518-1284]  | 0.35           |
| 11         | 14  | M      | Kabuki syndrome<br>IgG subclass deficiency | BSA = 0.27                                                                                  | 2.3         | 1060 [518-1284] | 0.25           |
| 12         | 4   | M      | Nijmegen breakage syndrome                 | BSA = 1.8                                                                                   | 10          | 756 [468-1150]  | 0.5            |

|    |    |   |                            |                                                                                  |      |                    |      |
|----|----|---|----------------------------|----------------------------------------------------------------------------------|------|--------------------|------|
| 13 | 3  | F | Nijmegen breakage syndrome | BSA = 0.18                                                                       | 8.5  | 929<br>[468-1150]  | 0.5  |
| 14 | 11 | F | Nijmegen breakage syndrome | 6 Grass mix = 0.2<br>Birch pollen = 0.18<br>Cat = 0.2<br>Dog = 0.2<br>BSA = 0.17 | <10  | 663<br>[553-1631]  | 0.2  |
| 15 | 10 | M | Ataxia-telangiectasia      | Cow's milk = 0.16<br>BSA = 0.41                                                  | <1,5 | 1018<br>[518-1284] | 0.3  |
| 16 | 11 | K | Ataxia-telangiectasia      | BSA = 0.67                                                                       | 9    | 906<br>[553-1631]  | 0.3  |
| 17 | 11 | M | Ataxia-telangiectasia      | BSA = 0.45                                                                       | 8.6  | 815<br>[540-1822]  | 0.5  |
| 18 | 2  | M | SCID                       | <0.15                                                                            | 22.6 | 1016<br>[408-1120] | 0.3  |
| 19 | 5  | M | SCID                       | BSA = 0.37                                                                       | 7.5  | 898<br>[468-1150]  | 0.45 |

Abbreviations: BSA - bovine serum albumin; CVID – common variable immunodeficiency; Ig – immunoglobulin; No – number; PID – primary immunodeficiency; PRKDC - Protein Kinase, DNA-Activated, Catalytic Subunit; SCID – severe combined immunodeficiency; sIgE – specific IgE
