# Supplementary material for: Serum Allergen-Specific IgE among Pediatric Patients with Primary Immunodeficiency
Source: MDPI journal article supplement (doi:10.3390/children9040466), 2022-03-25
Supplement: s1 [file s1]

**Table S1.** Patients' baseline characteristics according to PID classification.

| Type of PID                                     | No of patients           | No of men         | No of women       | Median age | Mean age | Immunoglobulin replacement therapy | HSCT                                                      |
|-------------------------------------------------|--------------------------|-------------------|-------------------|------------|----------|------------------------------------|-----------------------------------------------------------|
| SCID                                            | n=2<br>(2.78% of all)    | n=2<br>(100.00%)  | n=0<br>(0%)       | 4          | 4        | n=2 (100.00%)                      | Before =<br>n=1<br>(50.00%)<br>After =<br>n=1<br>(50.00%) |
| Ataxia-telangiectasia                           | n=4<br>(5.56% of all)    | n=2<br>(50.00%)   | n=2<br>(50.00%)   | 10         | 10       | n=3 (75.00%)                       | n=0<br>(0%)                                               |
| Nijmegen syndrome                               | n=3<br>(4.17% of all)    | n=1<br>(33.33%)   | n=2<br>(66.67%)   | 4          | 6        | n=3 (100.00%)                      | n=0<br>(0%)                                               |
| DiGeorge syndrome                               | n=2<br>(2.78% of all)    | n=1<br>(50.00%)   | n=1<br>(50.00%)   | 6          | 6        | n=0 (0%)                           | n=0<br>(0%)                                               |
| Kabuki syndrome                                 | n=1<br>(1.39% of all)    | n=1<br>(100.00%)  | n=0<br>(0%)       | 14         | 14       | n=1 (100.00%)                      | n=0<br>(0%)                                               |
| PRKDC mutation associated with immunodeficiency | n=1<br>(1.39% of all)    | n=1<br>(100.00%)  | n=0<br>(0%)       | 9          | 9        | n=1 (100.00%)                      | n=0<br>(0%)                                               |
| Predominantly Ab deficiency (n=51):             | n=51<br>(70.83% of all)  | n= 35<br>(68.63%) | n=16<br>(31.37%)  | 7          | 8        | n=9 (17.65%)                       | n=0<br>(0%)                                               |
| - CVID (n=3)                                    | n=3<br>(4.17% of all)    | n=3<br>(100.00%)  | n=0<br>(0%)       | 14         | 13       | n=3 (100.00%)                      |                                                           |
| - X-linked agammaglobulinemia (n=1)             | n=1<br>(1.39% of all)    | n=1<br>(100.00%)  | n=0<br>(0%)       | 15         | 15       | n=1 (100.00%)                      |                                                           |
| - other hypogammaglobulinemia's* (n=20)         | n= 20<br>(27.78% of all) | n= 15<br>(75.00%) | n= 5<br>(25.00%)  | 7          | 8        | n=4 (20.00%)                       |                                                           |
| - IgG subclass deficiency (n=20)                | n= 20<br>(27.78% of all) | n= 10<br>(50.00%) | n= 10<br>(50.00%) | 7          | 7        | n=1 (5%)                           |                                                           |

|                                                                |                           |                 |                 |   |   |          |             |
|----------------------------------------------------------------|---------------------------|-----------------|-----------------|---|---|----------|-------------|
| - selective IgA deficiency (n=7)                               | n= 7<br>(9.72%<br>of all) | n=6<br>(85.71%) | n=1<br>(14.29%) | 7 | 9 | n=0 (0%) |             |
| Congenital defects of phagocyte number, function or both (n=3) | n= 3<br>(4.16%<br>of all) | n=2<br>(66.67%) | n=1<br>(33.33%) | 3 | 3 | 0% (n=0) | n=0<br>(0%) |
| Complement deficiency (n=2)                                    | n=2<br>(2.77%<br>of all)  | n=1<br>(50.00%) | n=1<br>(50.00%) | 5 | 5 | n=0 (0%) | n=0<br>(0%) |
| Others (n=3)**                                                 | n=3<br>(4.16%<br>of all)  | n=1<br>(33.33%) | n=2<br>(66.67%) | 7 | 7 | n=0 (0%) | n=0<br>(0%) |

\*Other hypogammaglobulinemia's: IgG subclass deficiency with IgA deficiency/ IgG deficiency/ IgG and IgA deficiency/ IgM deficiency/ IgM and IgG subclass deficiency/ IgM and IgA deficiency/ IgM, IgG and IgA deficiency/ transient hypogammaglobulinemia of infancy.

Others\*\*: congenital asplenia, lymphocyte T deficiency

Abbreviations: Ab – antibody; CVID – common variable immunodeficiency; HSCT – human stem cell transplantation; Ig – immunoglobulin; no-number; PRKDC – Protein Kinase, DNA-Activated, Catalytic Subunit; SCID – severe combined immunodeficiency
