# Supplementary material for: Serum Allergen-Specific IgE among Pediatric Patients with Primary Immunodeficiency
Source: MDPI journal article supplement (doi:10.3390/children9040466), 2022-03-25
Supplement: s1 [file s1]

**Table S5.** Manifestation of allergy in patients with PID, expressed as previously diagnosed asthma, food allergy, allergic conjunctivitis; atopic dermatitis, allergic rhinitis or urticaria.

| Patient No | Age | Gender | PID type                                   | Previous diagnosis of allergic disease | Duration of allergy symptoms | sIgE level:<br>*not detected,<br>**detected,<br>***positive<br>[ kU/L]                                                                                                                                                          | IgG level<br>[mg/dl] | Eosinophil count<br>[10 <sup>3</sup> /uL] | Antihistamines | Ig replacement therapy |
|------------|-----|--------|--------------------------------------------|----------------------------------------|------------------------------|---------------------------------------------------------------------------------------------------------------------------------------------------------------------------------------------------------------------------------|----------------------|-------------------------------------------|----------------|------------------------|
| 1          | 17  | M      | IgA deficiency                             | A, AD, AR                              | From early childhood         | Detected<br>Cat = 0.27<br>Dog = 0.32                                                                                                                                                                                            | 1386                 | 0,09                                      | Yes            | No                     |
| 2          | 9   | F      | DiGeorge syndrome                          | FA                                     | From early childhood         | Positive<br>BSA = 0.46                                                                                                                                                                                                          | 1275                 | 0,21                                      | No             | No                     |
| 3          | 8   | M      | IgM, IgG subclass deficiency               | A, AR, FA                              | From early childhood         | Positive<br>6 Grass mix = 2.9<br>D.pteronysinus >100<br>D. farinae >100<br>Cat = 33.0<br>Dog = 0.89<br>A.alternata = 12                                                                                                         | 614                  | 1,77                                      | Yes            | No                     |
| 4          | 6   | M      | IgG subclass deficiency                    | A, AR, FA                              | From infancy                 | Not detected<br><0.15                                                                                                                                                                                                           | 637                  | 0,22                                      | Yes            | No                     |
| 5          | 14  | M      | IgM deficiency                             | AR, FA                                 | Few years                    | Positive<br>D.pteronysinus = 13.0<br>D. farinae =65.0<br>Cat = 0.81<br>BSA = 0.5                                                                                                                                                | 1025                 | 0,12                                      | No             | No                     |
| 6          | 13  | M      | IgA deficiency                             | AD                                     | From infancy                 | Positive<br>Horse = 0.53<br>Cow's milk = 2.0<br>BSA = 38.0                                                                                                                                                                      | 1472,7               | 0,17                                      | No             | No                     |
| 7          | 3   | M      | Transient hypogammaglobulinemia of infancy | FA in the past                         | Infancy                      | Not detected<br><0.15                                                                                                                                                                                                           | 508                  | 0,17                                      | No             | No                     |
| 8          | 6   | F      | IgG subclass deficiency                    | A, AD, FA                              | From infancy                 | Positive<br>6 Grass mix >100<br>Birch pollen >100<br>Mugwort pollen = 0.86<br>D.pteronysinus =4.5<br>D. farinae =48<br>Cat = 0.27<br>Dog = 74<br>C.herbarum = 1.9<br>A.alternata = 5.0<br>Egg white = 0.94<br>Cow's milk = 0.94 | 964                  | 0,32                                      | Yes            | No                     |

|    |    |   |                                         |            |              |                                                                                                                                                                                                                           |      |      |     |     |
|----|----|---|-----------------------------------------|------------|--------------|---------------------------------------------------------------------------------------------------------------------------------------------------------------------------------------------------------------------------|------|------|-----|-----|
|    |    |   |                                         |            |              | Casein = 0.36<br>Flour Mix 0.46<br>Rice = 0.86<br>Peanut = 54.0<br>Hazelnut = 0.91<br>Carrot = 0.77<br>Potato = 1.8<br>Apple = 0.99                                                                                       |      |      |     |     |
| 9  | 9  | M | PRKDC mutation, IgG subclass deficiency | AD, AR, FA | Few years    | Positive<br>6 Grass mix =4.1<br>Birch pollen =0.36<br>Mugwort pollen = 0.88<br>Cat = 0.96<br>Dog = 0.63                                                                                                                   | 969  | 0,23 | Yes | Yes |
| 10 | 1  | M | IgG deficiency                          | AD         | From infancy | Not detected<br><0.15                                                                                                                                                                                                     | 254  | 0,11 | No  | No  |
| 11 | 12 | F | IgG subclass deficiency                 | AR         | 1 year       | Positive<br>6 Grass mix >100<br>Birch pollen =3.5<br>Mugwort pollen = 0.81<br>D.pteronyssinus = 1.3<br>D. farinae = 11<br>Cat = 4.1<br>Dog = 0.6<br>A.alternata = 1.2<br>Flour Mix = 0.43<br>Rice = 0.48<br>Carrot = 0.50 | 1108 | 0,17 | Yes | No  |
| 12 | 6  | M | IgA deficiency                          | A, AR      | 2 years      | Positive<br>D.pteronyssinus >100<br>D. farinae >100<br>BSA = 4.8<br>Cow's milk = 0.44                                                                                                                                     | 1376 | 0,35 | Yes | No  |
| 13 | 5  | M | IgG subclass deficiency                 | AD         | From infancy | Positive<br>BSA = 0.42                                                                                                                                                                                                    | 992  | 0,12 | No  | No  |
| 14 | 2  | F | IgG subclass deficiency                 | AD         | From infancy | Detected<br>Cat = 0.23<br>Dog = 0.31<br>Egg Yolk = 0,17<br>Hazelnut = 0.2                                                                                                                                                 | 576  | 0,76 | No  | No  |
| 15 | 4  | F | IgG subclass deficiency                 | A          | 3 years      | Positive<br>Birch pollen =1.3<br>Cat = 15                                                                                                                                                                                 | 480  | 0,72 | Yes | No  |
| 16 | 4  | M | IgG subclass deficiency                 | AD         | From infancy | Not detected<br><0.15                                                                                                                                                                                                     | 594  | 0,12 | No  | No  |
| 17 | 8  | M | IgM and IgG subclass deficiency         | A, AR, FA  | 6 years      | Positive<br>D. farinae = 1.1                                                                                                                                                                                              | 823  | 0,21 | No  | No  |

|    |     |   |                                 |            |                      |                                                                                                                                                                                                                                                     |      |      |     |    |
|----|-----|---|---------------------------------|------------|----------------------|-----------------------------------------------------------------------------------------------------------------------------------------------------------------------------------------------------------------------------------------------------|------|------|-----|----|
| 18 | 2,5 | M | IgG subclass deficiency         | AD, FA     | From infancy         | Positive<br>BSA = 0.9                                                                                                                                                                                                                               | 509  | 0,91 | No  | No |
| 19 | 7   | F | IgG subclass deficiency         | AR         | 2 years              | Detected<br>Cat = 0.21                                                                                                                                                                                                                              | 838  | 0,39 | No  | No |
| 20 | 9   | M | IgG subclass deficiency         | A          | From early childhood | Detected<br>Birch pollen = 0.17<br>A.fumigatus = 0.21                                                                                                                                                                                               | 619  | 0,57 | No  | No |
| 21 | 13  | F | IgG subclass deficiency         | AR         | Few years            | Not Detected<br><0.15                                                                                                                                                                                                                               | 613  | 0,04 | No  | No |
| 22 | 6   | F | IgA and IgG subclass deficiency | AD, AR, FA | From infancy         | Positive<br>6 Grass mix = 60<br>Birch pollen = 1.7                                                                                                                                                                                                  | 895  | 0,12 | Yes | No |
| 23 | 10  | F | IgG subclass deficiency         | AR         | Few years            | Positive<br>6 Grass mix >100<br>Birch pollen = 0.63<br>Mugwort pollen = 0.64                                                                                                                                                                        | 778  | 0,22 | No  | No |
| 24 | 6   | M | IgA deficiency                  | A          | From infancy         | Positive<br>BSA = 0.89<br>Cow's milk = 0.41                                                                                                                                                                                                         | 1296 | 0,67 | No  | No |
| 25 | 3   | F | Complement deficiency           | AD         | From infancy         | Positive<br>Dog = 0.37<br>Horse = 0.36<br>BSA = 9.9<br>Cow's milk = 0.73                                                                                                                                                                            | 939  | 0,2  | No  | No |
| 26 | 9   | M | IgG subclass deficiency         | A, AD, FA  | From infancy         | Detected<br>BSA = 0.27                                                                                                                                                                                                                              | 826  | 0,07 | No  | No |
| 27 | 2   | M | IgG deficiency                  | AD, FA     | From infancy         | Positive<br>6 Grass mix = 0.35<br>Birch pollen = 0.93                                                                                                                                                                                               | 454  | 0,18 | Yes | No |
| 28 | 10  | F | Impaired cellular immunity      | U          | Few months           | Positive<br>6 Grass mix = 2.7<br>Birch pollen = 0.36<br>Mugwort pollen = 0.58<br>D.pteronyssinus = 0.81<br>D. farinae = 0.94<br>Cow's milk = 0.52<br>BSA = 4.4<br>Flour Mix = 0.37<br>Rice = 0.44<br>Carrot = 0.39<br>Potato = 0.93<br>Apple = 1.00 | 939  | 0,19 | Yes | No |
| 29 | 16  | M | IgM deficiency                  | AD, AR     | From early childhood | Positive<br>6 Grass mix >100<br>Birch pollen = 0.50                                                                                                                                                                                                 | 987  | 0,17 | Yes | No |

|    |    |   |                                          |                   |                         |                                                                    |      |      |     |     |
|----|----|---|------------------------------------------|-------------------|-------------------------|--------------------------------------------------------------------|------|------|-----|-----|
|    |    |   |                                          |                   |                         | Mugwort pollen<br>= 0.51<br>Cow's milk = 0.54<br>BSA = 4.9         |      |      |     |     |
| 30 | 2  | M | Phagocyte number/<br>function deficiency | U                 | From<br>infancy         | Positive<br>Cow's milk = 0.77<br>BSA = 7.0                         | 683  | 0,22 | No  | No  |
| 31 | 4  | M | IgG deficiency                           | AC, AD,<br>FA     | From<br>infancy         | Not Detected<br><0.15                                              | 849  | 0,73 | Yes | Yes |
| 32 | 10 | M | Ataxia-telangiectasia                    | FA, DIA           | From<br>infancy         | Positive<br>BSA = 0.41                                             | 1018 | 0,38 | No  | Yes |
| 33 | 4  | F | Phagocyte number/<br>function deficiency | FA in the<br>past | Infancy                 | Detected<br>Cat = 0.27                                             | 653  | 0,08 | No  | No  |
| 34 | 7  | F | IgG subclass deficiency                  | FA in the<br>past | Infancy                 | Detected<br>Birch pollen = 0.18                                    | 751  | 0,12 | No  | No  |
| 35 | 7  | F | Congenital asplenia                      | AR                | Few years               | Positive<br>6 Grass mix = 4.0<br>Horse = 0.72<br>A.alternata = 9.4 | 1349 | 0,27 | Yes | No  |
| 36 | 9  | M | IgG deficiency                           | A                 | From early<br>childhood | Positive<br>BSA = 0.51                                             | 1145 | 0,17 | No  | Yes |
| 37 | 8  | F | IgG subclass deficiency                  | AD, AR            | From early<br>childhood | Detected<br>Birch pollen =<br>0.18<br>BSA = 0.29                   | 742  | 0,1  | Yes | Yes |
| 38 | 4  | M | Nijmegen breakage<br>syndrome            | AD                | From<br>infancy         | Positive<br>BSA = 1.8<br>Cow's milk = 0.4                          | 756  | 0,09 | No  | Yes |
| 39 | 2  | M | Impaired cellular<br>immunity            | AD                | From<br>infancy         | Detected<br>Birch pollen =<br>0.16                                 | 671  | 0,15 | No  | No  |
| 40 | 12 | M | IgG subclass deficiency                  | A                 | From early<br>childhood | Detected<br>Dog = 0.29                                             | 1304 | 0,28 | No  | No  |
| 41 | 12 | F | IgG deficiency                           | A                 | From early<br>childhood | Detected<br>BSA = 0.29                                             | 981  | 0,54 | No  | Yes |

Abbreviations: \* not detected - <0.15 kUa/L, \*\* detected – 0.15 kUa/L<=IgE<0.35 kUa/L; \*\*\*positive ≥0.35 kUa/L  
AC – allergic conjunctivitis; AD – atopic dermatitis; AR – allergic rhinitis; A – asthma; BSA – bovine serum  
albumin; DIA – drug-induced anaphylaxis; F – female; FA – food allergy; IVIG (+) – immunoglobulin replacement  
therapy; M – male; No – number; PID – primary immunodeficiencies; PRKDC - Protein Kinase, DNA-Activated,  
Catalytic Subunit; U – urticaria.
